# Supplementary material
Source: bioRxiv or medRxiv preprint supplement (https://www.biorxiv.org/highwire/filestream/116583/field_highwire_adjunct_files/0/384172-1.pdf)
Supplement: Supplementary file [file 384172-1.pdf]

## Additional file 1

### Non-coding Class Switch Recombination-related transcription in human normal and pathological immune responses

Helena Kuri-Magaña<sup>1,2</sup>; Leonardo Collado-Torres<sup>3,4</sup>; Andrew E. Jaffe<sup>3,4,5,6</sup>; Humberto Valdovinos-Torres<sup>1</sup>; Marbella Ovilla-Muñoz<sup>1</sup>; Juan M Téllez-Sosa<sup>1</sup>; Laura C Bonifaz Alfonso<sup>7</sup>; Jesús Martínez-Barnetche<sup>1\*</sup>

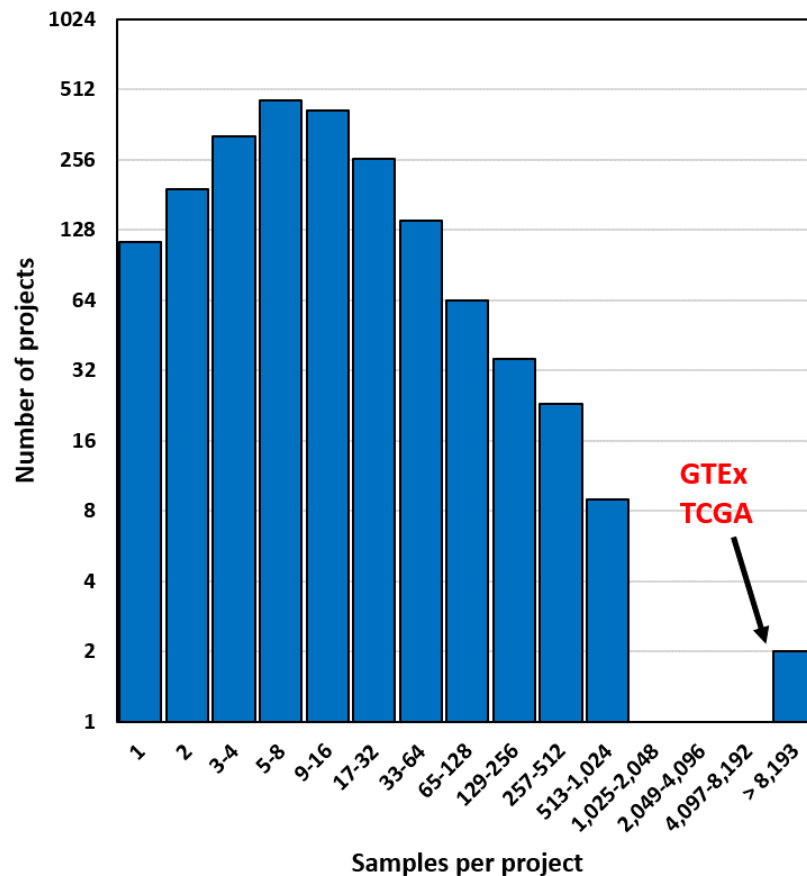

**Figure S1:** The whole *recount2* dataset was classified according to the number of samples per project (X-axis) and the number of projects (Y-axis). The number of projects analyzed with *recount2* was 2,036 with of 70,603 samples (Median = 8 samples per project; Mean = 32 samples per project). TCGA and GTEx are two projects that have 11,284 and 9,661 samples, respectively, comprising 29.6% of all samples.

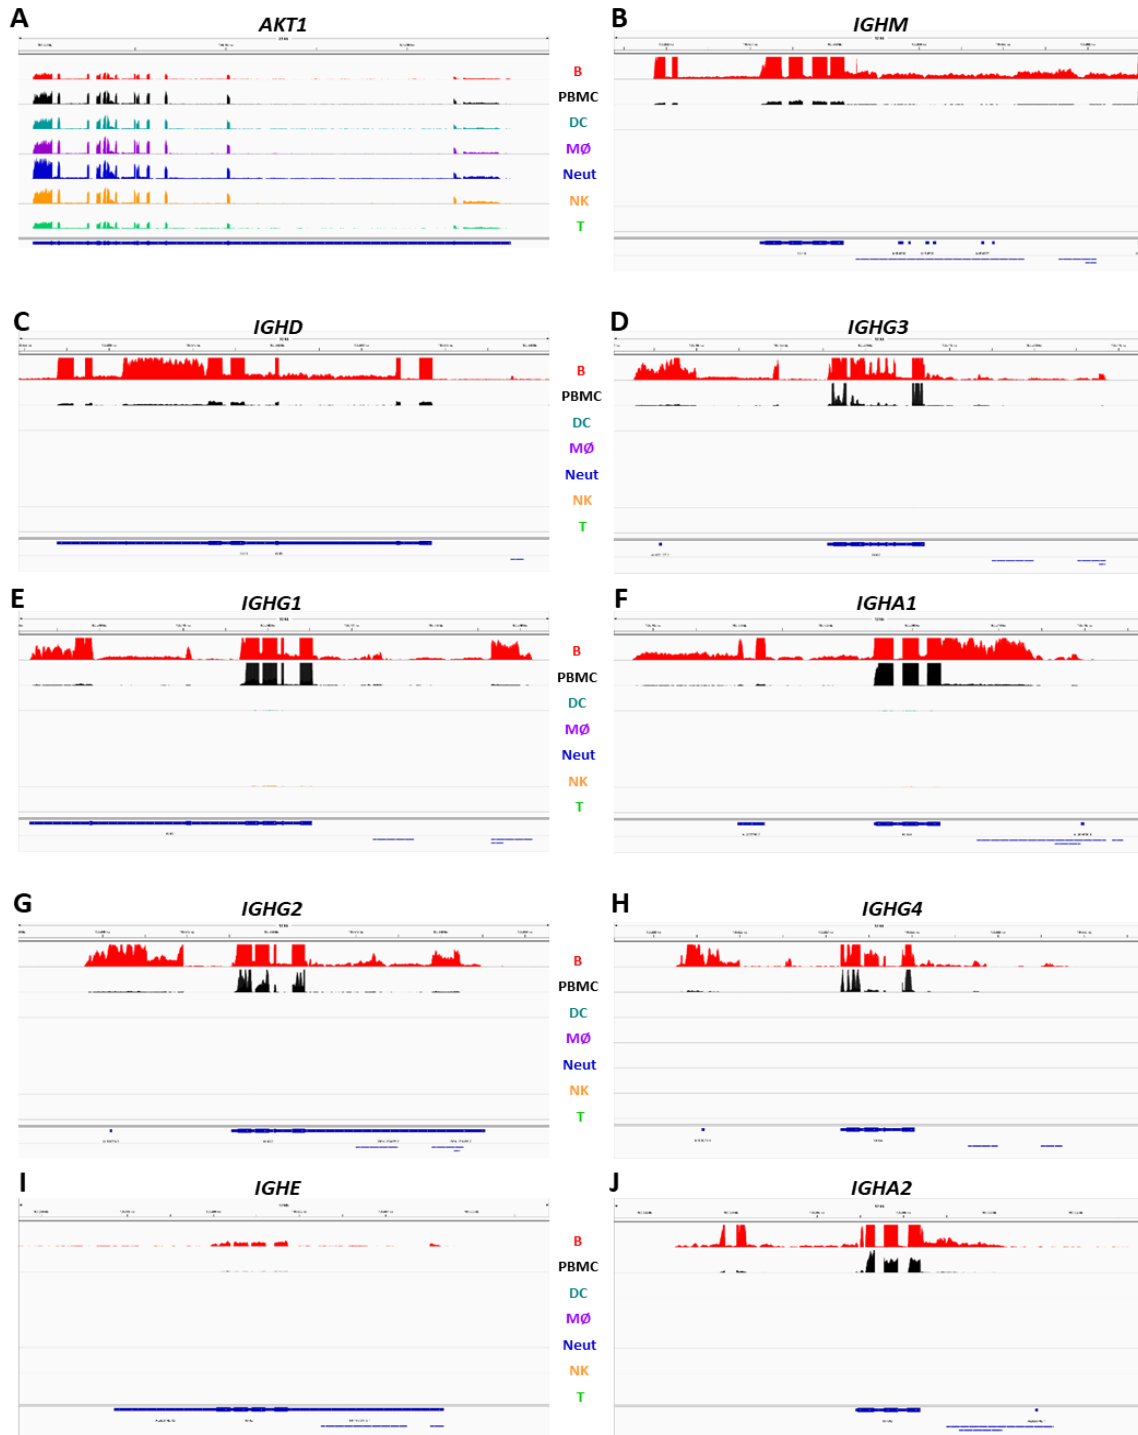

**Figure S2: CSRnc transcription is B cells-specific.** Coverage graphs of the *AKT1* (A) and IGH locus (B-J) showing transcriptional activity in isolated hematopoietic-derived differentiated cells from project SRP051688 [20]. B cells (B, red track), total PBMC's (PBMC, black track), myeloid dendritic cells (DC, sea green track), monocytes (MØ, purple track), neutrophils (Neut, blue track), Natural killer cells (NK, orange track) and T cells (T, green track).

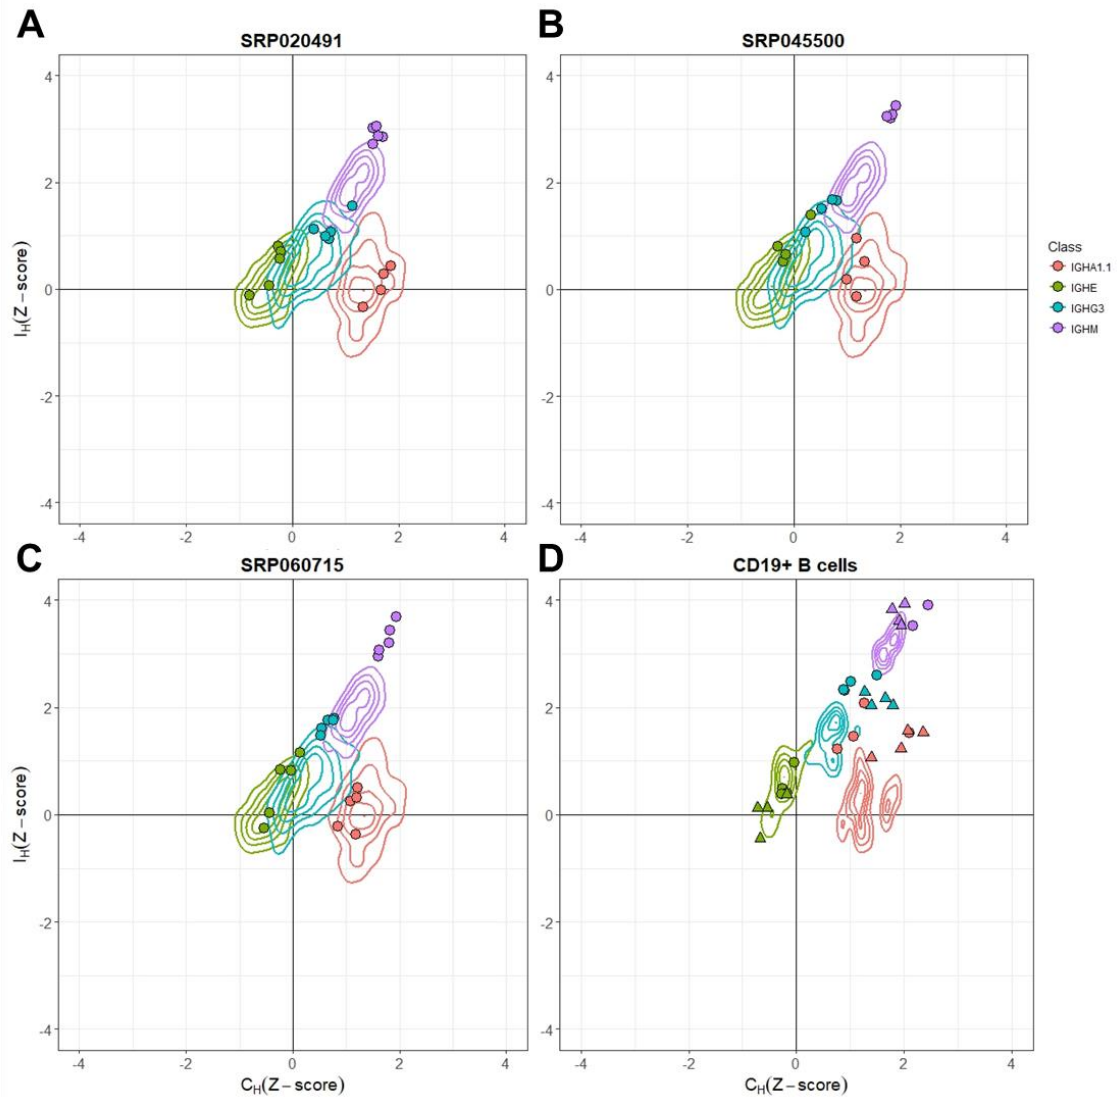

**Figure S3: CSRnc transcription pattern in whole blood is similar to peripheral blood sorted CD19<sup>+</sup> B cells.** Relative CSRnc and  $C_H$  transcription (Z-score) in whole blood RNA from the GTEx dataset is shown as a 2-D contour plot (n = 456 samples) in A-C. Filled colored circles correspond to Z-scores of peripheral blood sorted CD19<sup>+</sup> B cells derived from three independent RNA-seq projects [15, 18], overlaid to the GTEx data (**Additional file 2: Table S1**). **D**) 2-D density data of sorted CD19<sup>+</sup> peripheral blood B cells Z-values of the projects shown in A-C (n = 14), overlaid with the corresponding Z scores of sorted tonsillar naïve B cells (*circles*, n = 4) and tonsillar germinal center B cells (*triangles*, n = 4) from project SRP021509 [16].

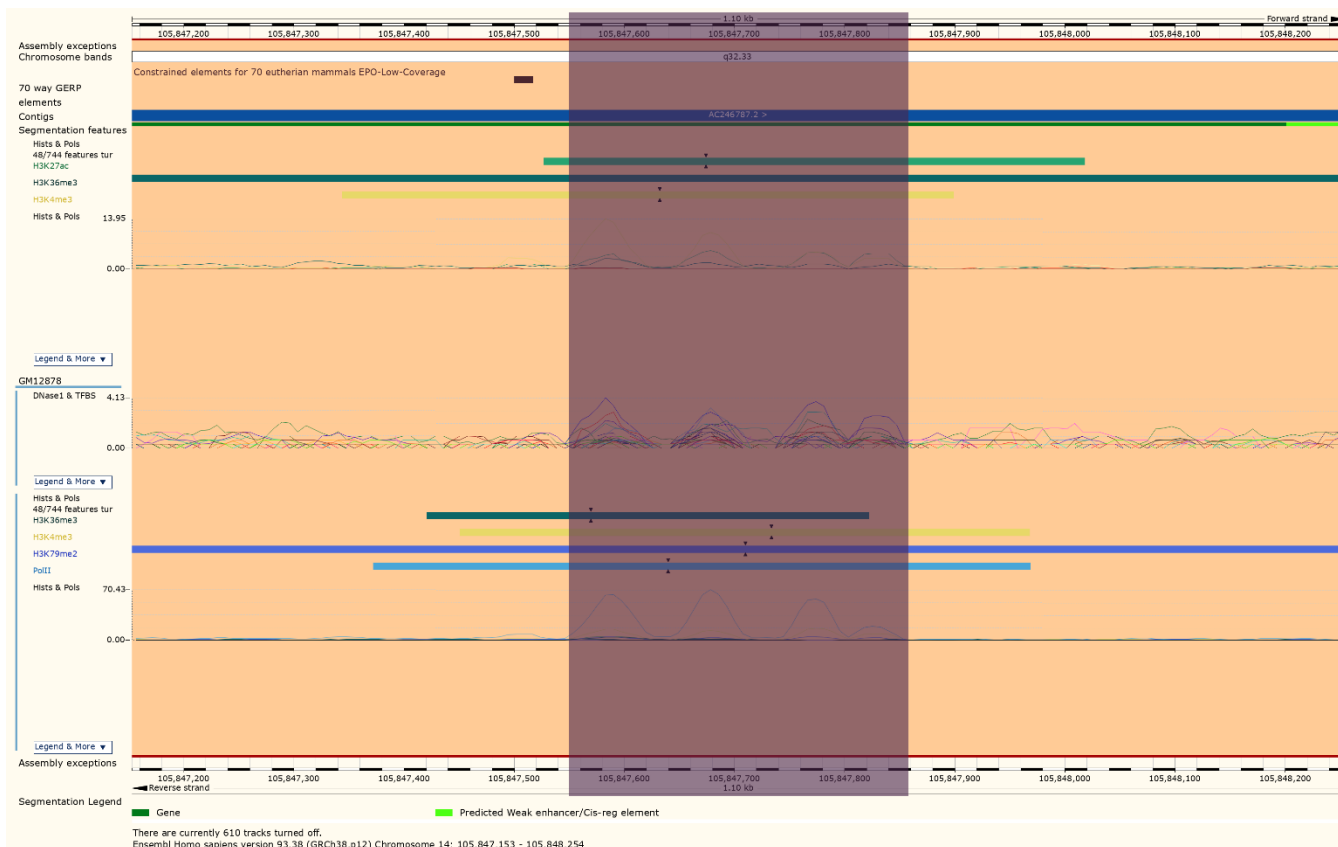

**Figure S4: A novel transcribed region in the *IGHM-IGHD* intron locus ( $I_{\delta}$ ) displays epigenetic marks associated with active transcription in B cells.** The ENSEMBL Genome Browser was used to search for epigenetic marks in the identified  $I_H$  of the IgH locus in human chromosome 14 [24]. The upper track corresponds to the Roadmap Epigenomics project annotation for peripheral blood B cells [25]. Signals of H3K36me3 (*dark green* trace) and H3K4me3 (*ochre* trace) and H3K27ac (*green* trace), all marks of active transcription overlap with the  $I_{\delta}$  non-coding exon (*shaded rectangle*). The lower track corresponds to ENCODE project data on EBV-transformed lymphoblastoid cell line GM12878 [26]. In addition to H3K36me3 (*dark green* trace) and H3K4me3 (*ochre* trace) enrichment, H3K79me2 (*dark blue*) and PolII (*sky blue*) enrichment was identified.

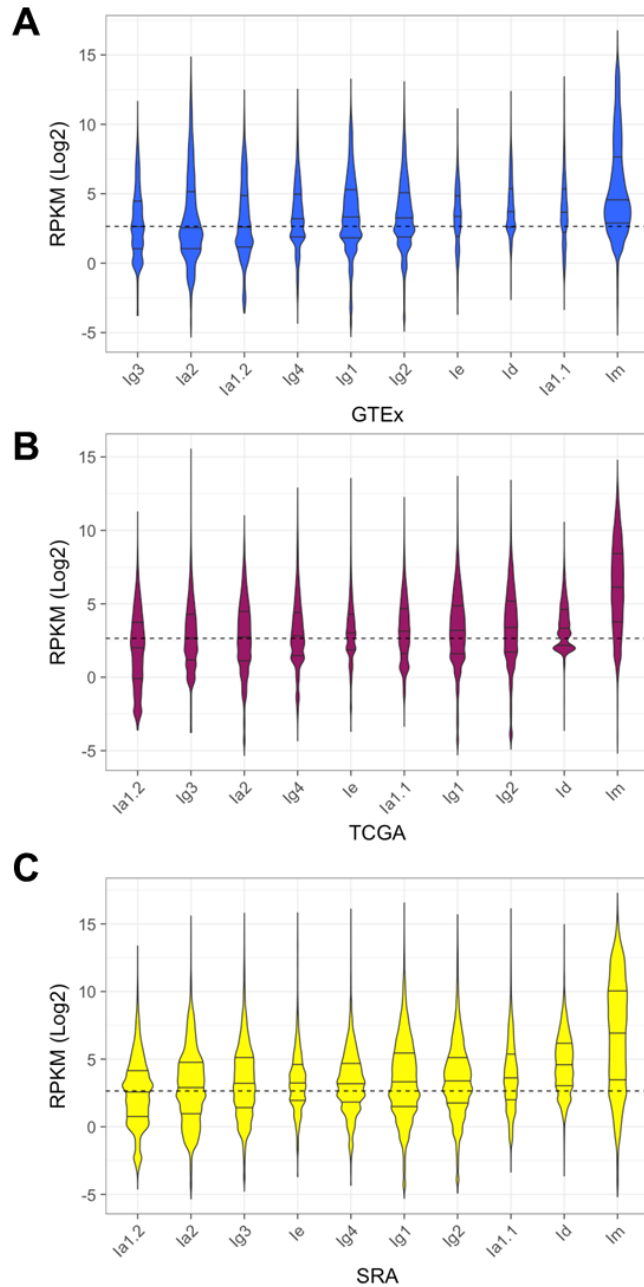

**Figure S5: CSRnc transcription according to IH and project dataset.** Violin plots of  $\log_2$  RPKM distribution per CSRnc transcript ( $I_H$ ) for **A)** GTEx, **B)** TCGA and **C)** SRA datasets. The area of the violin is scaled to the amount of samples and violins are ordered according to the median  $\log_2$  RPKM.  $I_\mu$  has the highest transcription levels and is the most widely expressed. A sharp decrease in the transcription of remaining IH transcripts followed. Unexpectedly,  $I_\delta$  and  $I_\epsilon$  transcription was relatively high, although its transcription was restricted to a small proportion of samples. Contrastingly,  $I_\gamma3$  and  $I_\alpha2$  transcription levels were the lowest in all datasets and were transcribed in a relatively high proportion of samples. This data indicates that  $I_\mu$  expression is higher and more widespread (i.e. expressed in many samples and projects of various origins), whereas other  $I_H$  transcription levels were usually lower and their transcription is more restricted.

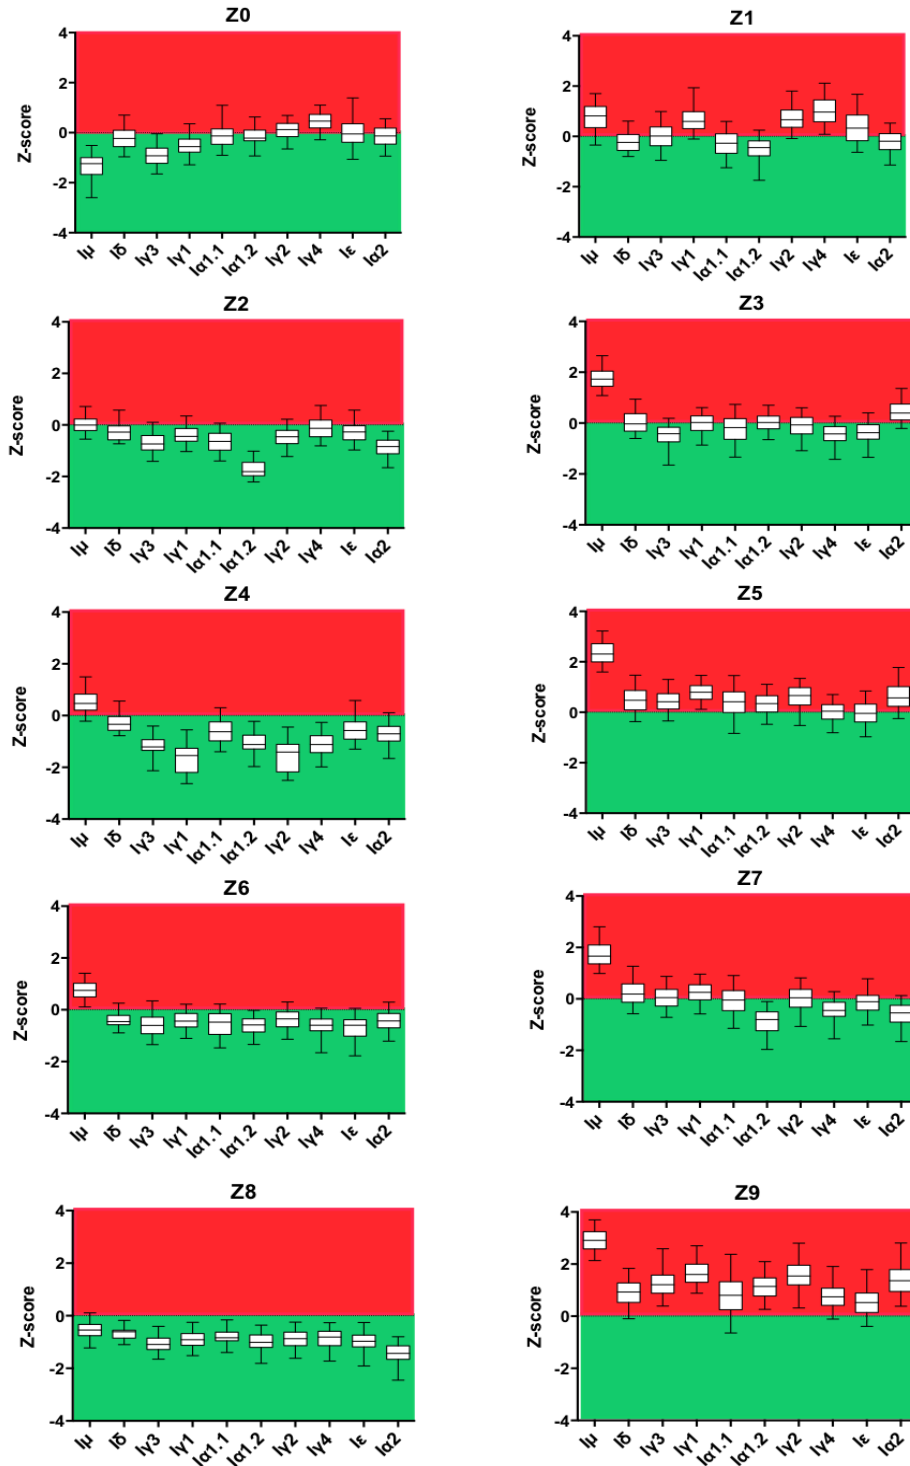

**Figure S6:** CSRnc transcriptional profiles identified by k-means clustering of the recount2 dataset (Figure 4). The Z-score distribution (y axis) per I<sub>H</sub> (x axis) for each cluster of the ten generated clusters is represented in boxplots. Dotted line indicates a Z-score = 0, which corresponds to the mean expression per sample ( $\log_2$  RPKM = 2.65). Higher than the mean transcription is marked in red, whereas lower than the mean is marked in green, following the color code of Figures 3A and Figure 4.

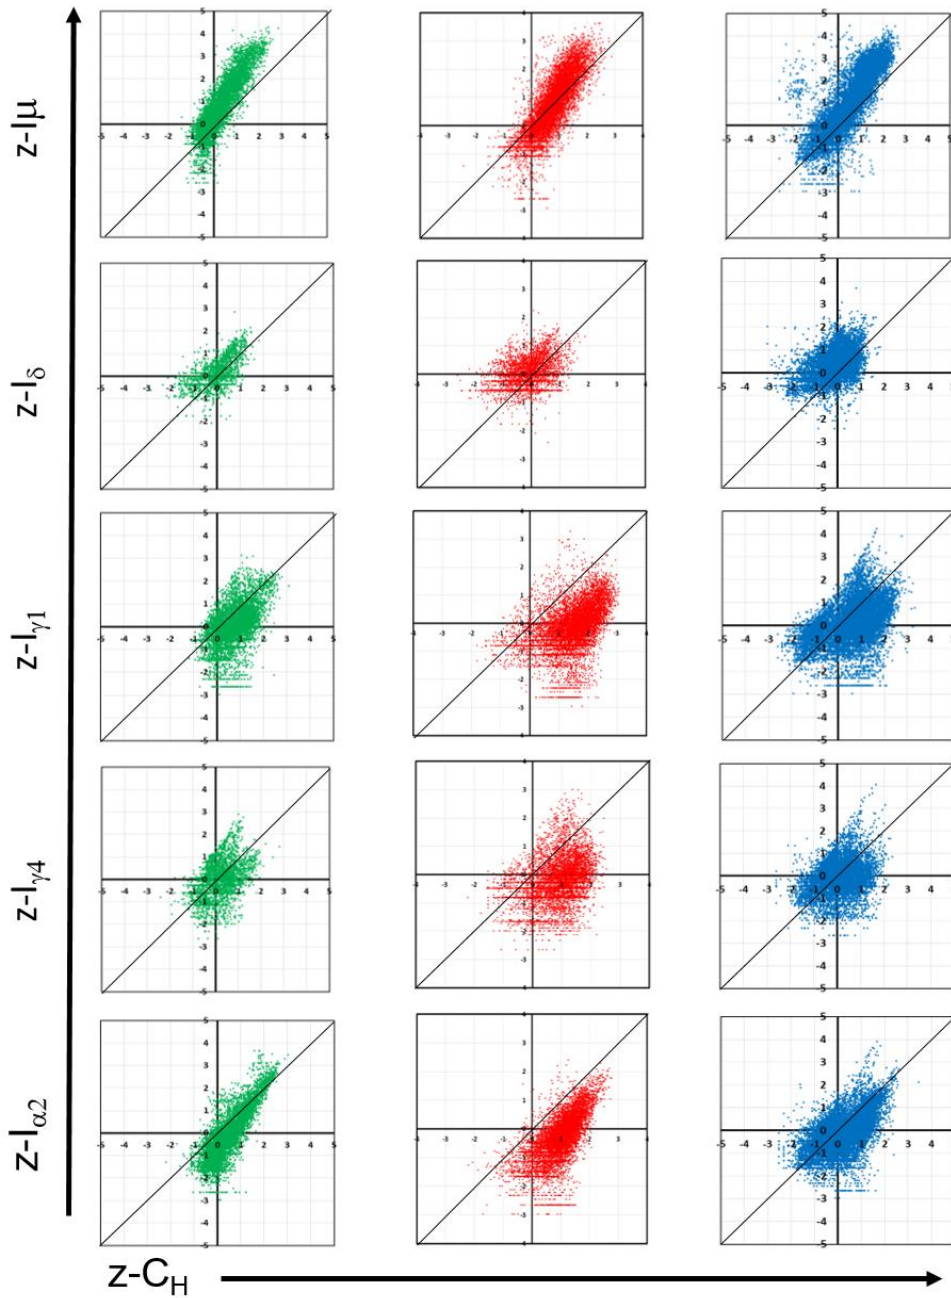

**Figure S7: Correlation between CSRnc  $I_H$  transcription and coding  $C_H$  transcription.** As for CSRnc  $I_H$  transcripts, the corresponding coding  $C_H$   $\log_2$ RPKM were transformed to Z-scores to make comparisons of their respective relative expression in two dimensional ( $C_H$  Z-score, x axis;  $I_H$  Z-score, y axis). Representative plots for  $I/C_\mu$ ,  $I/C_\delta$ ,  $I/C_{\gamma1}$ ,  $I/C_{\gamma4}$  and  $I/C_{\alpha2}$  are shown for GTEx (green), TCGA (red) and SRA (blue). The black diagonal is shown to emphasize deviations from orthogonal plane. Samples above the diagonal indicate higher relative CSRnc transcription that it's corresponding coding  $C_H$  counterpart.

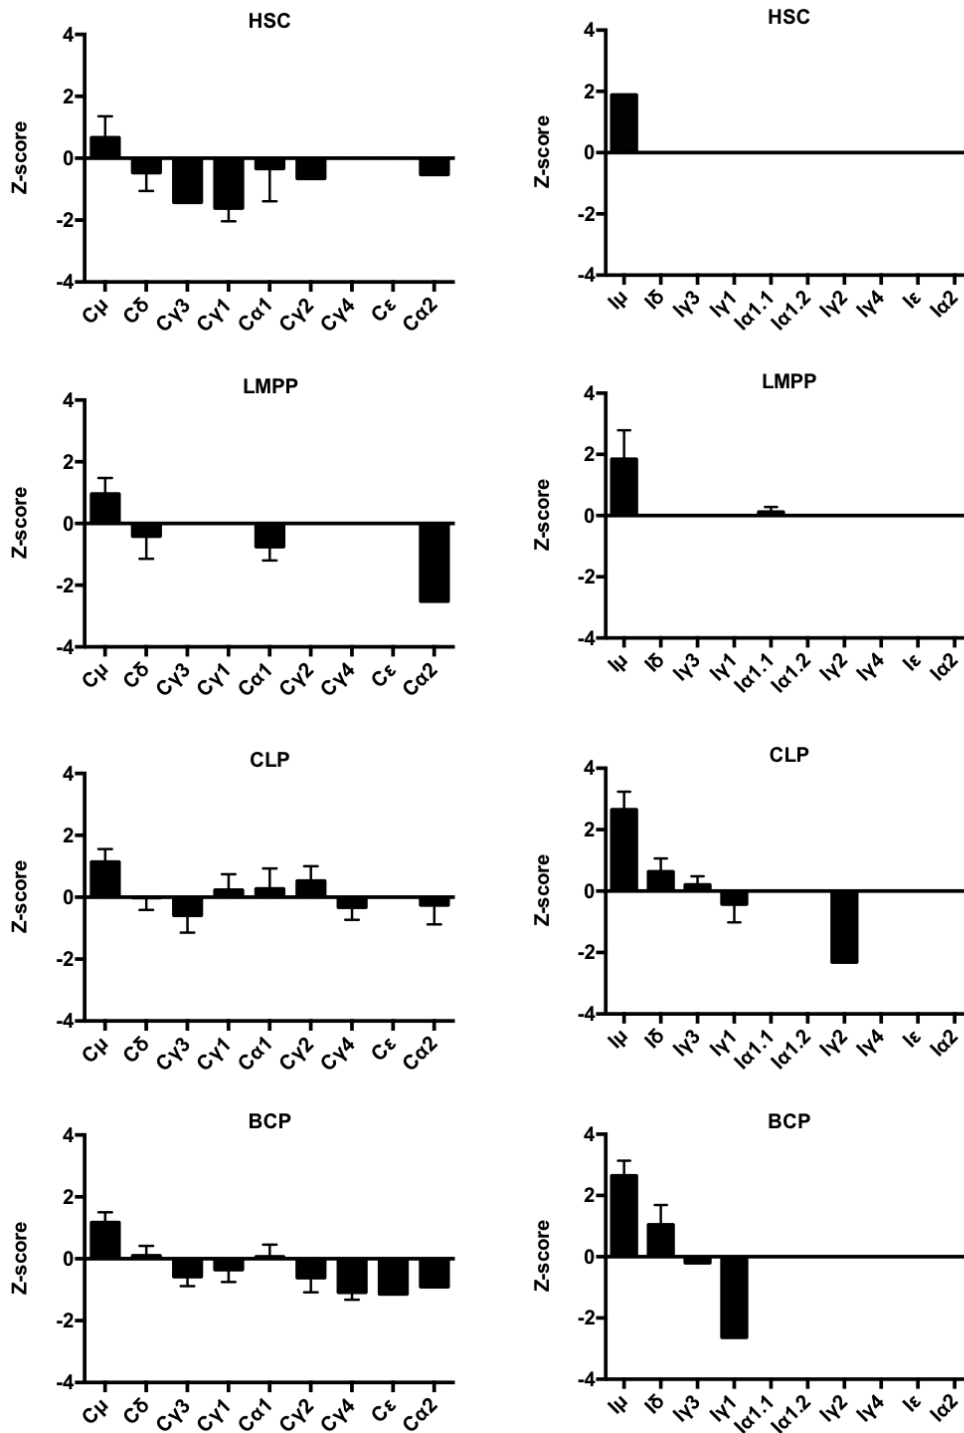

**Figure S8: CSRnc and C<sub>H</sub> transcription in Bone marrow lymphoid precursors.** Z-score in every I<sub>H</sub> in bone marrow from hematopoietic stem cells (HSC, CD34<sup>+</sup>CD38<sup>+</sup>lin<sup>-</sup>), lymphoid multipotent progenitors (LMPP, CD34<sup>+</sup>CD45RA<sup>+</sup>CD38<sup>+</sup>CD10<sup>-</sup>CD62L<sup>hi</sup>lin<sup>-</sup>), common lymphoid progenitors (CLP, CD34<sup>+</sup>CD38<sup>+</sup>CD10<sup>+</sup>CD45RA<sup>+</sup>lin<sup>-</sup>) and committed B cell progenitors (BCP, CD34<sup>+</sup>CD38<sup>+</sup>CD19<sup>+</sup>) from study SRP058719 [30] are shown in the *left column*. The corresponding C<sub>H</sub> expression is shown in the *right column*.



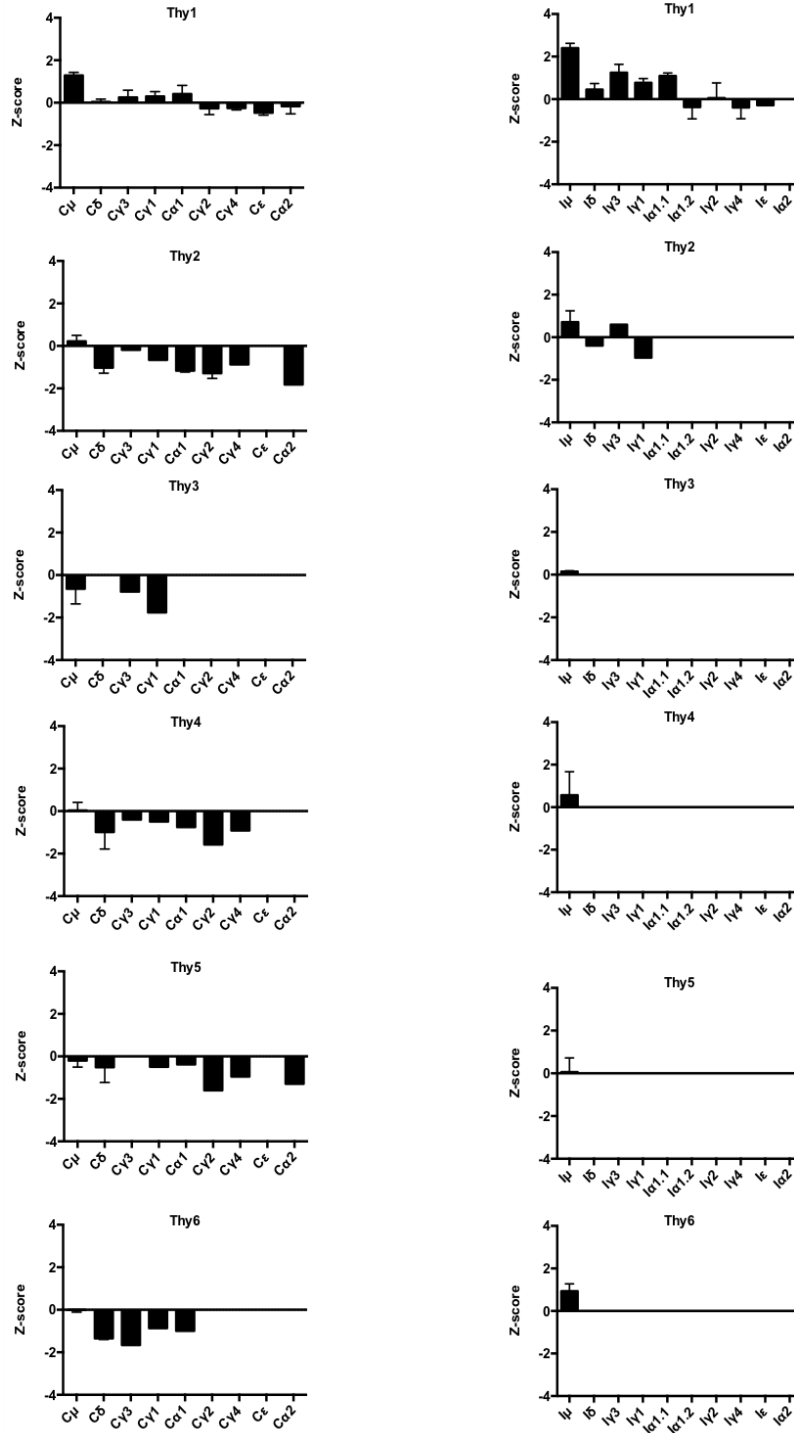

**Figure S9: CSRnc and C<sub>H</sub> transcription in thymic lymphoid precursors.** Z-score of every I<sub>H</sub> (*left column*) in thymic early lymphoid precursors with myeloid potential Thy1 (CD34<sup>+</sup>CD7<sup>-</sup> CD1a<sup>-</sup> CD4<sup>-</sup>CD8<sup>-</sup>) and Thy2 (CD34<sup>+</sup>CD7<sup>+</sup>CD1a<sup>-</sup> CD4<sup>-</sup>CD8<sup>-</sup>), as well as fully committed T cell precursors Thy3 (CD34<sup>+</sup>CD7<sup>+</sup>CD1a<sup>+</sup>CD4<sup>-</sup> CD8<sup>-</sup>), Thy4 (CD4<sup>+</sup>CD8<sup>+</sup>), Thy5 (CD3<sup>+</sup>CD4<sup>+</sup>CD8<sup>-</sup>), and Thy6 (CD3<sup>+</sup>CD4<sup>-</sup> CD8<sup>+</sup>) from study SRP058719 [30]. The corresponding C<sub>H</sub> transcription is on the *right column*. Each bar represents the mean ± SD of two biological replicates.

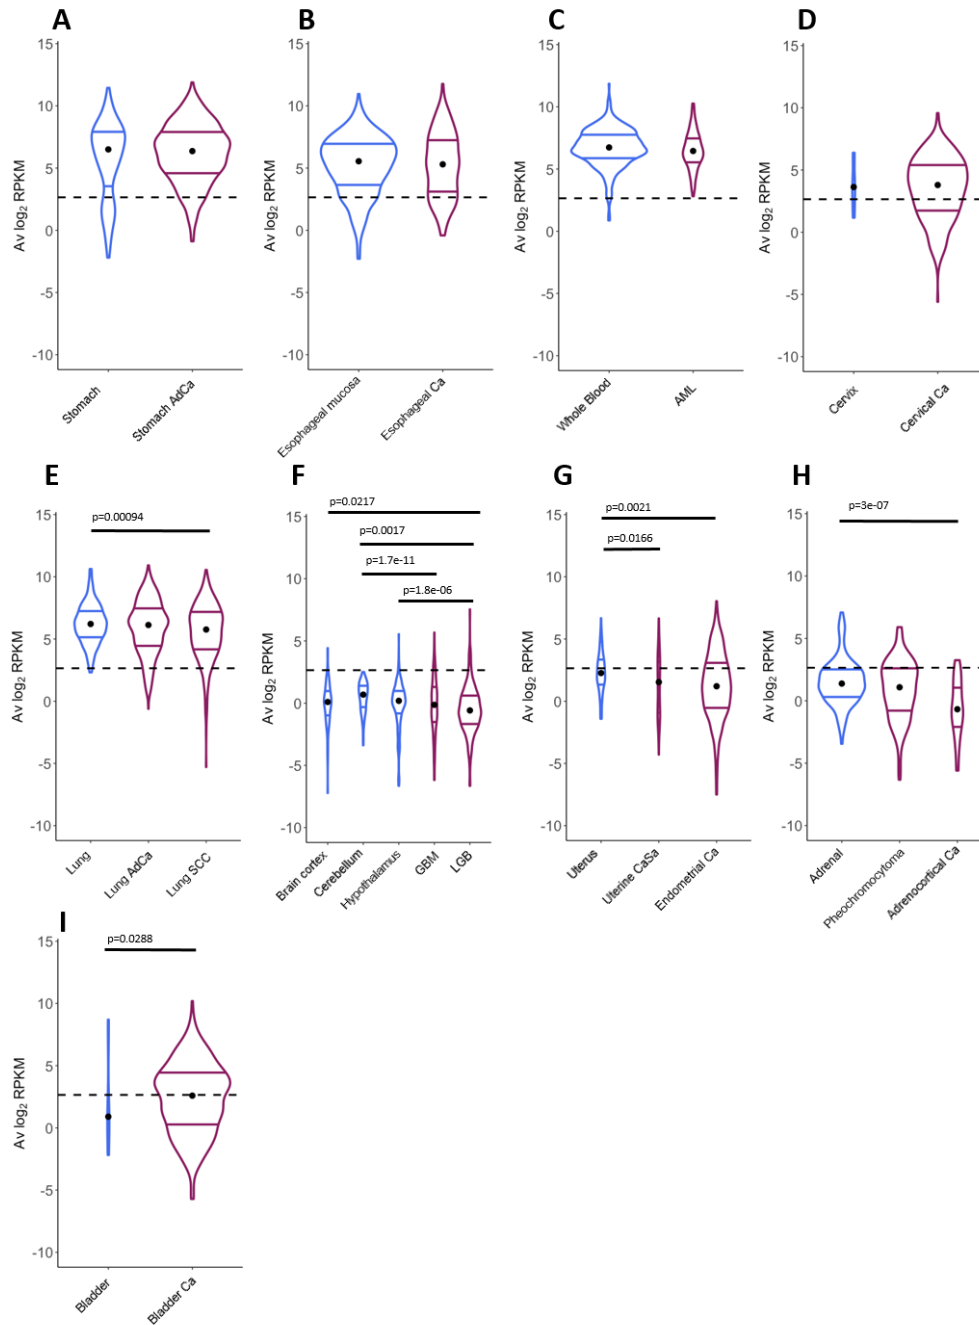

**Figure S10: Comparison of CSRnc transcription in healthy tissue and its tumor counterpart.** Violin plots of the average  $\log_2$  RPKM distribution in healthy tissue (blue) in comparison with its cancer tissue counterpart (purple). Violin area corresponds to sample count. Median (black dot) and quartiles are shown for each violin. Dashed black line marks the mean average  $\log_2$  RPKM (2.65). No differences in CSRnc transcription in tumors was observed when compared to its healthy counterpart in **A-D**. No differences were detected in healthy lung and lung adenocarcinoma, however CSRnc transcription was lower in lung squamous cell carcinoma (**E**). Lower CSRnc transcription was also noted in central nervous system tumors (**F**), uterine carcinosarcoma and endometrial carcinoma (**G**) and adrenocortical carcinoma, but not pheochromocytoma (**H**). Increased CSRnc transcription was detected in bladder cancer (**I**). The conducted statistical test were Wilcoxon rank sum test with continuity correction for two-sample comparisons, and Kruskal-Wallis test with *post hoc* Dunn's test correction for multiple comparisons.
